# Supplementary material for: Role of fructosamine-3-kinase in protecting against the onset of microvascular and macrovascular complications in patients with T2DM
Source: PubMed Central journal article supplement — BMJ Open Diabetes Res Care. 2020 May 27;8(1):e001256. doi: 10.1136/bmjdrc-2020-001256 (PMC7259852; doi:10.1136/bmjdrc-2020-001256), 2020-05-27
Supplement: bmjdrc-2020-001256supp001.pdf [file bmjdrc-2020-001256supp001.pdf]

THE ROLE OF FRUCTOSAMINE-3-KINASE IN PROTECTING AGAINST THE ONSET OF MICRO- AND MACROVASCULAR COMPLICATIONS IN PATIENTS WITH T2DM

Giovanni Sartore, Eugenio Ragazzi, Silvia Burlina, Renata Paleari, Nino Cristiano Chilelli, Andrea Mosca, Francesca Avemaria, Annunziata Lapolla

**Supplementary Table 1.** Primer sequences, PCR product lengths, and melting temperatures (T<sub>m</sub>).

| Exon     | Primer  |                          | PCR product (bp) | T <sub>m</sub> (°C) |
|----------|---------|--------------------------|------------------|---------------------|
| Promoter | forward | TGGAATCAGCAGCCCCAC       | 276              | 67                  |
|          | reverse | GGCTTCGCGCTTCTTGCG       |                  | 72                  |
| 1        | forward | AGCGCCTCAGCCGACAGG       | 244              | 63                  |
|          | reverse | AGGCCCCGAGAGACCCGC       |                  | 68                  |
| 2        | forward | TGGTAGCTTCTGTCAAGGGCCCA  | 314              | 66                  |
|          | reverse | CCTTTCTCTGTCTCTCTGTTTGT  |                  | 64                  |
| 3        | forward | TCTCAAATGGAACAACTGGGTGG  | 217              | 64                  |
|          | reverse | GGTAGACAATGTGGCTGGATCAAG |                  | 65                  |
| 4        | forward | GACCACCTATATTCTAGCATGCGT | 251              | 64                  |
|          | reverse | AAAGAGTGGGTGACCAGCATTAGG |                  | 65                  |
| 5        | forward | AGGCAGCACTTGGCTCCGAATTGC | 227              | 69                  |
|          | reverse | GGATCATGAGAGGACCAGC      |                  | 59                  |
| 6-(5')   | forward | GAACGAGGTGATGAGACCG      | 274              | 59                  |
|          | reverse | GGATCTCCGGTGGTAGGC       |                  | 62                  |
| 6-(3')   | forward | CGAGTTTGAAGTGGCAATCG     | 256              | 58                  |
|          | reverse | ACGGGGAGACGGAGACGGGGACGG |                  | 75                  |
